# Supplementary material for: Solvent-free continuous flow hydrogenation of N-methylpyrrolidone to N-methylpyrrolidine catalyzed by bimetallic Pt/V on HAP
Source: Royal Society of Chemistry journal article supplement (doi:10.1039/d2cy00581f), 2022-01-01
Supplement: d2cy00581f1.pdf [file d2cy00581f1.pdf]

## Supporting Information

### **The Solvent-free Continuous Flow Hydrogenation of N-Methyl Pyrrolidone to N-methylpyrrolidine catalyzed with bimetallic Pt/V on HAP**

Pengxiang Gao,<sup>a</sup> Song Liu,<sup>a</sup> Jitao Yang,<sup>a</sup> Dishun Zhao,<sup>b</sup> Qingbin Liu,<sup>\*a</sup>

<sup>a</sup> Hebei Key Laboratory of Organic Functional Molecules, College of Chemistry and Materials Science, Hebei Normal University, Shijiazhuang, 050024, China, E-mail:

Liuqingbin@hebtu.edu.cn

<sup>b</sup> College of Chemical Pharmaceutical Engineering, Hebei University of Science and Technology, Shijiazhuang, 050018, China

## Contents

|                                                                                                            |            |
|------------------------------------------------------------------------------------------------------------|------------|
| <b>S1. General information and methods .....</b>                                                           | <b>S1</b>  |
| <b>S2. Reactor equipment specifications .....</b>                                                          | <b>S1</b>  |
| <b>S3. The results of the yields of N-methylpyrrolidine under specified<br/>conditions each hour .....</b> | <b>S1</b>  |
| <b>S4. Identification of N-methylpyrrolidine .....</b>                                                     | <b>S20</b> |
| <b>S5. Identification of by-products .....</b>                                                             | <b>S21</b> |
| <b>References .....</b>                                                                                    | <b>S21</b> |

## **S1. General information and methods**

Pt(acac)<sub>2</sub>, VO(acac)<sub>2</sub>, Hydroxyapatite(HAP) were all purchased from Innochem Co. Ltd., and used without any further purification. N-methylpyrrolidone was purchased from Damao Chemical Reagent Factory and used as received. The Pt/V/HAP catalyst was prepared refer to S1.

## **S2. Reactor equipment specifications**

The reactor was used for solid catalytic reactions under continuous flow conditions, and the reactor was purchased from Yanzheng Shanghai Experimental Instrument Co., LTD., and the H<sub>2</sub> used in the reactor was fed in to the system from a steel cylinder.

## **S3. The results of the yields of N-methylpyrrolidine under specified conditions each hour**

### S3.1 Pt/V/HAP (Pt/V molar ratio = 1:5)

**Table S1** The yields of N-methylpyrrolidine every hour <sup>a</sup>

| Time (h) | Yield (%) | Conversion (%) |
|----------|-----------|----------------|
| 1        | 52.71     | 52.71          |
| 2        | 50.57     | 50.57          |
| 3        | 33.51     | 33.51          |
| 4        | 25.40     | 25.40          |
| 5        | 20.57     | 20.57          |
| 6        | 18.84     | 18.84          |
| 7        | 22.41     | 22.41          |
| Average  | 32.00     | 32.00          |

<sup>a</sup> Pt/V molar ratio = 1:5, temperature = 220 °C, pressure of H<sub>2</sub> = 20 bar, flow rate of H<sub>2</sub> = 100 sccm, WHSV = 1.2 h<sup>-1</sup>

### S3.2 Pt/V/HAP (Pt/V molar ratio=1:1)

**Table S2** The yields of N-methylpyrrolidine every hour<sup>a</sup>

| Time (h) | Yield (%) | Conversion (%) |
|----------|-----------|----------------|
| 1        | 71.19     | 73.17          |
| 2        | 70.25     | 72.06          |
| 3        | 69.00     | 69.03          |
| 4        | 66.53     | 67.50          |
| 5        | 65.55     | 66.92          |
| 6        | 66.37     | 66.39          |
| 7        | 64.70     | 65.70          |
| Average  | 67.66     | 68.68          |

<sup>a</sup> Pt/V molar ratio = 1:1, temperature = 220 °C, pressure of H<sub>2</sub> = 20 bar, flow rate of H<sub>2</sub> = 100 sccm, WHSV = 1.2 h<sup>-1</sup>

### S3.3 Pt/V/HAP (Pt/V molar ratio=1:0.5)

**Table S3** The yields of N-methylpyrrolidine every hour<sup>a</sup>

| Time (h) | Yield (%) | Conversion (%) |
|----------|-----------|----------------|
| 1        | 88.50     | 95.21          |
| 2        | 86.19     | 92.06          |
| 3        | 86.64     | 92.58          |
| 4        | 85.45     | 92.13          |
| 5        | 83.34     | 93.78          |
| 6        | 86.88     | 86.88          |
| 7        | 78.49     | 83.75          |
| Average  | 85.07     | 90.91          |

<sup>a</sup> Pt/V molar ratio = 1:0.5, temperature = 220 °C, pressure of H<sub>2</sub> = 20 bar, flow rate of H<sub>2</sub> = 100 sccm, WHSV = 1.2 h<sup>-1</sup>

**Table S4** The yields of N-methylpyrrolidine every hour at 210 °C and the same as entry 13 in Table 2<sup>a</sup>

| Time (h) | Yield (%) | Conversion (%) |
|----------|-----------|----------------|
| 1        | 84.02     | 89.29          |
| 2        | 93.88     | 96.9           |
| 3        | 87.71     | 89.94          |
| 4        | 86.73     | 88.75          |
| 5        | 86.60     | 88.46          |
| 6        | 86.20     | 87.91          |
| 7        | 85.64     | 87.42          |
| Average  | 87.25     | 89.81          |

<sup>a</sup> Pt/V molar ratio = 1:0.5, temperature = 210 °C, pressure of H<sub>2</sub> = 20 bar, flow rate of H<sub>2</sub> = 100 sccm, WHSV = 1.2 h<sup>-1</sup>

**Table S5** The yields of N-methylpyrrolidine every hour at 200 °C <sup>a</sup>

| Time (h) | Yield (%) | Conversion (%) |
|----------|-----------|----------------|
| 1        | 77.68     | 81.81          |
| 2        | 93.47     | 95.29          |
| 3        | 84.76     | 85.57          |
| 4        | 59.38     | 59.91          |
| 5        | 58.94     | 59.35          |
| 6        | 60.60     | 60.91          |
| 7        | 58.99     | 59.30          |
| Average  | 70.55     | 71.73          |

<sup>a</sup> Pt/V molar ratio = 1:0.5, temperature = 200 °C, pressure of H<sub>2</sub> = 20 bar, flow rate of H<sub>2</sub> = 100 sccm, WHSV = 1.2 h<sup>-1</sup>

**Table S6** The yields of N-methylpyrrolidine every hour at 230 °C <sup>a</sup>

| Time (h) | Yield (%) | Conversion (%) |
|----------|-----------|----------------|
| 1        | 78.47     | 83.97          |
| 2        | 79.47     | 91.99          |
| 3        | 79.86     | 93.16          |
| 4        | 81.03     | 94.25          |
| 5        | 81.01     | 93.69          |
| 6        | 59.69     | 63.15          |
| 7        | 72.43     | 80.87          |
| Average  | 75.99     | 85.87          |

<sup>a</sup> Pt/V molar ratio = 1:0.5, temperature = 230 °C, pressure of H<sub>2</sub> = 20 bar, flow rate of H<sub>2</sub> = 100 sccm, WHSV = 1.2 h<sup>-1</sup>

**Table S7** The yields of N-methylpyrrolidine every hour at 240 °C <sup>a</sup>

| Time (h) | Yield (%) | Conversion (%) |
|----------|-----------|----------------|
| 1        | 56.57     | 77.19          |
| 2        | 71.77     | 90.31          |
| 3        | 69.46     | 87.90          |
| 4        | 70.51     | 92.02          |
| 5        | 69.82     | 92.33          |
| 6        | 71.37     | 91.60          |
| 7        | 71.39     | 93.65          |
| Average  | 68.70     | 89.29          |

<sup>a</sup> Pt/V molar ratio = 1:0.5, temperature = 240 °C, pressure of H<sub>2</sub> = 20 bar, flow rate of H<sub>2</sub> = 100 sccm, WHSV = 1.2 h<sup>-1</sup>

**Table S8** The yields of N-methylpyrrolidine every hour at 30 bar <sup>a</sup>

| Time (h) | Yield (%) | Conversion (%) |
|----------|-----------|----------------|
| 1        | 83.78     | 90.69          |
| 2        | 93.67     | 96.52          |
| 3        | 68.10     | 73.94          |
| 4        | 66.85     | 68.35          |
| 5        | 67.11     | 68.07          |
| 6        | 80.29     | 81.49          |
| 7        | 76.78     | 77.77          |
| Average  | 76.65     | 79.55          |

<sup>a</sup> Pt/V molar ratio = 1:0.5, temperature = 210 °C, pressure of H<sub>2</sub> = 30 bar, flow rate of H<sub>2</sub> = 100 sccm, WHSV = 1.2 h<sup>-1</sup>

**Table S9** The yields of N-methylpyrrolidine every hour at 25 bar<sup>a</sup>

| Time (h) | Yield (%) | Conversion (%) |
|----------|-----------|----------------|
| 1        | 76.68     | 77.92          |
| 2        | 80.49     | 81.30          |
| 3        | 79.27     | 80.24          |
| 4        | 85.42     | 89.79          |
| 5        | 89.38     | 92.17          |
| 6        | 81.09     | 82.15          |
| 7        | 65.91     | 66.88          |
| Average  | 79.75     | 81.49          |

<sup>a</sup> Pt/V molar ratio = 1:0.5, temperature = 210 °C, pressure of H<sub>2</sub>=25 bar, flow rate of H<sub>2</sub>=100 sccm, WHSV = 1.2 h<sup>-1</sup>

**Table S10** The yields of N-methylpyrrolidine every hour at 15 bar<sup>a</sup>

| Time (h) | Yield (%) | Conversion (%) |
|----------|-----------|----------------|
| 1        | 73.40     | 75.65          |
| 2        | 79.82     | 82.00          |
| 3        | 80.06     | 82.23          |
| 4        | 81.21     | 83.39          |
| 5        | 79.58     | 82.17          |
| 6        | 80.52     | 82.70          |
| 7        | 80.93     | 83.08          |
| Average  | 79.36     | 81.60          |

<sup>a</sup> Pt/V molar ratio=1:0.5, temperature = 210 °C, pressure of H<sub>2</sub>=15 bar, flow rate of H<sub>2</sub> = 100 sccm, WHSV = 1.2 h<sup>-1</sup>



**Table S11** The yields of N-methylpyrrolidine every hour at 10 bar <sup>a</sup>

| Time (h) | Yield (%) | Conversion (%) |
|----------|-----------|----------------|
| 1        | 73.08     | 77.75          |
| 2        | 78.68     | 81.44          |
| 3        | 73.10     | 76.17          |
| 4        | 67.20     | 71.10          |
| 5        | 71.12     | 74.80          |
| 6        | 69.77     | 73.39          |
| 7        | 69.87     | 73.43          |
| Average  | 71.83     | 75.44          |

<sup>a</sup> Pt/V molar ratio = 1:0.5, temperature = 210 °C, pressure of H<sub>2</sub> = 10 bar, flow rate of H<sub>2</sub> = 100 sccm, WHSV = 1.2 h<sup>-1</sup>

**Table S12** The yields of N-methylpyrrolidine every hour at 0 sccm <sup>a</sup>

| Time (h) | Yield (%) | Conversion (%) |
|----------|-----------|----------------|
| 1        | 22.88     | 24.15          |
| 2        | 10.82     | 10.88          |
| 3        | 6.89      | 8.30           |
| 4        | 7.47      | 8.75           |
| 5        | 7.72      | 10.88          |
| 6        | 6.89      | 8.30           |
| 7        | 7.47      | 8.75           |
| Average  | 10.02     | 11.43          |

<sup>a</sup> Pt/V molar ratio = 1:0.5, temperature = 210 °C, pressure of H<sub>2</sub>=20 bar, flow rate of H<sub>2</sub> = 0 sccm, WHSV = 1.2 h<sup>-1</sup>

**Table S13** The yields of N-methylpyrrolidine every hour at 50 sccm <sup>a</sup>

| Time (h) | Yield (%) | Conversion (%) |
|----------|-----------|----------------|
| 1        | 59.24     | 69.39          |
| 2        | 56.60     | 63.88          |
| 3        | 53.33     | 55.44          |
| 4        | 38.71     | 39.97          |
| 5        | 47.81     | 48.95          |
| 6        | 42.72     | 43.89          |
| 7        | 42.11     | 43.44          |
| Average  | 48.65     | 52.14          |

<sup>a</sup> Pt/V molar ratio = 1:0.5, temperature = 210 °C, pressure of H<sub>2</sub> = 20 bar, flow rate of H<sub>2</sub> = 50 sccm, WHSV = 1.2 h<sup>-1</sup>

**Table S14** The yields of N-methylpyrrolidine every hour at 150 sccm <sup>a</sup>

| Time (h) | Yield (%) | Conversion (%) |
|----------|-----------|----------------|
| 1        | 88.29     | 90.88          |
| 2        | 91.37     | 94.01          |
| 3        | 91.21     | 94.13          |
| 4        | 85.05     | 92.65          |
| 5        | 93.09     | 96.05          |
| 6        | 90.77     | 96.32          |
| 7        | 91.11     | 94.45          |
| Average  | 90.13     | 94.07          |

<sup>a</sup> Pt/V molar ratio = 1:0.5, temperature = 210 °C, pressure of H<sub>2</sub> = 20 bar, flow rate of H<sub>2</sub> = 150 sccm, WHSV = 1.2 h<sup>-1</sup>

**Table S15** The yields of N-methylpyrrolidine every hour at 200 sccm <sup>a</sup>

| Time (h) | Yield (%) | Conversion (%) |
|----------|-----------|----------------|
| 1        | 87.89     | 92.18          |
| 2        | 91.08     | 95.09          |
| 3        | 91.00     | 96.48          |
| 4        | 89.18     | 96.18          |
| 5        | 92.60     | 96.31          |
| 6        | 93.60     | 97.07          |
| 7        | 91.17     | 95.50          |
| Average  | 90.93     | 95.54          |

<sup>a</sup> Pt/V molar ratio=1:0.5, temperature=210 °C, pressure of H<sub>2</sub>=20 bar, flow rate of H<sub>2</sub>=200 sccm, WHSV = 1.2 h<sup>-1</sup>

**Table S16** The yields of N-methylpyrrolidine every hour of entry 1 in Table 2 <sup>a</sup>

| Time (h) | Yield (%) | Conversion (%) |
|----------|-----------|----------------|
| 1        | 53.36     | 54.63          |
| 2        | 59.45     | 61.20          |
| 3        | 66.08     | 66.33          |
| 4        | 62.11     | 62.40          |
| 5        | 68.58     | 68.82          |
| 6        | 68.80     | 69.10          |
| 7        | 68.44     | 68.72          |
| Average  | 63.83     | 64.46          |

<sup>a</sup> Pt/V molar ratio = 1:0.5, temperature = 200 °C, pressure of H<sub>2</sub> = 15 bar, flow rate of H<sub>2</sub> = 100 sccm, WHSV = 1.2 h<sup>-1</sup>

**Table S17** The yields of N-methylpyrrolidine every hour of entry 2 in Table 2 <sup>a</sup>

| Time (h) | Yield (%) | Conversion (%) |
|----------|-----------|----------------|
| 1        | 69.26     | 72.89          |
| 2        | 71.44     | 73.19          |
| 3        | 78.51     | 88.95          |
| 4        | 63.20     | 79.52          |
| 5        | 65.29     | 81.39          |
| 6        | 63.86     | 66.22          |
| 7        | 71.22     | 73.33          |
| Average  | 68.97     | 76.50          |

<sup>a</sup> Pt/V molar ratio = 1:0.5, temperature = 220 °C, pressure of H<sub>2</sub> = 15 bar, flow rate of H<sub>2</sub> = 100 sccm, WHSV = 1.2 h<sup>-1</sup>

**Table S18** The yields of N-methylpyrrolidine every hour of entry 3 in Table 2 <sup>a</sup>

| Time (h) | Yield (%) | Conversion (%) |
|----------|-----------|----------------|
| 1        | 78.50     | 83.81          |
| 2        | 71.32     | 71.73          |
| 3        | 72.04     | 73.67          |
| 4        | 61.16     | 62.19          |
| 5        | 57.14     | 62.84          |
| 6        | 57.39     | 57.74          |
| 7        | 42.98     | 43.29          |
| Average  | 62.93     | 65.04          |

<sup>a</sup> Pt/V molar ratio = 1:0.5, temperature = 200 °C, pressure of H<sub>2</sub> = 25 bar, flow rate of H<sub>2</sub> = 100 sccm, WHSV = 1.2 h<sup>-1</sup>

**Table S19** The yields of N-methylpyrrolidine every hour of entry 4 in Table 2 <sup>a</sup>

| Time (h) | Yield (%) | Conversion (%) |
|----------|-----------|----------------|
| 1        | 55.73     | 56.12          |
| 2        | 69.79     | 70.80          |
| 3        | 79.26     | 81.03          |
| 4        | 82.91     | 85.39          |
| 5        | 83.92     | 86.27          |
| 6        | 83.28     | 85.72          |
| 7        | 81.20     | 83.65          |
| Average  | 76.57     | 78.43          |

<sup>a</sup> Pt/V molar ratio = 1:0.5, temperature = 220 °C, pressure of H<sub>2</sub> = 25 bar, flow rate of H<sub>2</sub> = 100 sccm, WHSV = 1.2 h<sup>-1</sup>

**Table S20** The yields of N-methylpyrrolidine every hour of entry 5 in Table 2 <sup>a</sup>

| Time (h) | Yield (%) | Conversion (%) |
|----------|-----------|----------------|
| 1        | 48.77     | 50.31          |
| 2        | 32.64     | 33.53          |
| 3        | 29.48     | 29.63          |
| 4        | 29.85     | 30.17          |
| 5        | 27.43     | 28.03          |
| 6        | 26.50     | 26.81          |
| 7        | 28.45     | 26.81          |
| Average  | 31.87     | 32.46          |

<sup>a</sup> Pt/V molar ratio = 1:0.5, temperature = 200 °C, pressure of H<sub>2</sub> = 20 bar, flow rate of H<sub>2</sub> = 50 sccm, WHSV = 1.2 h<sup>-1</sup>

**Table S21** The yields of N-methylpyrrolidine every hour of entry 6 in Table 2 <sup>a</sup>

| Time (h) | Yield (%) | Conversion (%) |
|----------|-----------|----------------|
| 1        | 47.41     | 48.46          |
| 2        | 48.44     | 49.89          |
| 3        | 47.31     | 48.45          |
| 4        | 44.88     | 47.57          |
| 5        | 39.48     | 41.43          |
| 6        | 38.48     | 39.71          |
| 7        | 34.95     | 36.47          |
| Average  | 42.99     | 44.57          |

<sup>a</sup> Pt/V molar ratio = 1:0.5, temperature = 220 °C, pressure of H<sub>2</sub> = 20 bar, flow rate of H<sub>2</sub> = 50 sccm, WHSV = 1.2 h<sup>-1</sup>

**Table S22** The yields of N-methylpyrrolidine every hour of entry 7 in Table 2 <sup>a</sup>

| Time (h) | Yield (%) | Conversion (%) |
|----------|-----------|----------------|
| 1        | 82.57     | 84.30          |
| 2        | 69.00     | 70.03          |
| 3        | 85.85     | 86.15          |
| 4        | 71.60     | 71.91          |
| 5        | 82.18     | 82.29          |
| 6        | 70.45     | 70.56          |
| 7        | 68.81     | 68.89          |
| Average  | 75.78     | 76.30          |

<sup>a</sup> Pt/V molar ratio = 1:0.5, temperature = 200 °C, pressure of H<sub>2</sub> = 20 bar, flow rate of H<sub>2</sub> = 150 sccm, WHSV = 1.2 h<sup>-1</sup>

**Table S23** The yields of N-methylpyrrolidine every hour of entry 8 in Table 2 <sup>a</sup>

| Time (h) | Yield (%) | Conversion (%) |
|----------|-----------|----------------|
| 1        | 71.27     | 71.78          |
| 2        | 77.53     | 81.35          |
| 3        | 86.16     | 92.20          |
| 4        | 71.18     | 73.10          |
| 5        | 70.43     | 71.26          |
| 6        | 81.80     | 88.17          |
| 7        | 55.51     | 58.08          |
| Average  | 73.41     | 76.56          |

<sup>a</sup> Pt/V molar ratio = 1:0.5, temperature = 220 °C, pressure of H<sub>2</sub> = 20 bar, flow rate of H<sub>2</sub> = 150 sccm, WHSV = 1.2 h<sup>-1</sup>

**Table S24** The yields of N-methylpyrrolidine every hour of entry 9 in Table 2 <sup>a</sup>

| Time (h) | Yield (%) | Conversion (%) |
|----------|-----------|----------------|
| 1        | 71.20     | 75.26          |
| 2        | 49.31     | 55.77          |
| 3        | 41.42     | 43.74          |
| 4        | 30.83     | 36.89          |
| 5        | 33.18     | 37.57          |
| 6        | 37.99     | 39.53          |
| 7        | 34.04     | 35.52          |
| Average  | 42.57     | 46.33          |

<sup>a</sup> Pt/V molar ratio = 1:0.5, temperature = 210 °C, pressure of H<sub>2</sub> = 15 bar, flow rate of H<sub>2</sub> = 50 sccm, WHSV = 1.2 h<sup>-1</sup>

**Table S25** The yields of N-methylpyrrolidine every hour of entry 10 in Table 2 <sup>a</sup>

| Time (h) | Yield (%) | Conversion (%) |
|----------|-----------|----------------|
| 1        | 31.33     | 36.01          |
| 2        | 29.01     | 31.57          |
| 3        | 44.53     | 46.40          |
| 4        | 47.17     | 51.82          |
| 5        | 45.44     | 49.65          |
| 6        | 41.63     | 46.09          |
| 7        | 41.26     | 42.62          |
| Average  | 40.05     | 43.45          |

<sup>a</sup> Pt/V molar ratio = 1:0.5, temperature = 210 °C, pressure of H<sub>2</sub> = 25 bar, flow rate of H<sub>2</sub> = 50 sccm, WHSV = 1.2 h<sup>-1</sup>

**Table S26** The yields of N-methylpyrrolidine every hour of entry 11 in Table 2 <sup>a</sup>

| Time (h) | Yield (%) | Conversion (%) |
|----------|-----------|----------------|
| 1        | 45.75     | 46.73          |
| 2        | 72.16     | 74.21          |
| 3        | 78.11     | 80.67          |
| 4        | 72.16     | 72.88          |
| 5        | 80.33     | 81.29          |
| 6        | 76.70     | 77.83          |
| 7        | 80.26     | 81.73          |
| Average  | 72.21     | 73.62          |

<sup>a</sup> Pt/V molar ratio = 1:0.5, temperature = 210 °C, pressure of H<sub>2</sub> = 15 bar, flow rate of H<sub>2</sub> = 150 sccm, WHSV = 1.2 h<sup>-1</sup>



**Table S27** The yields of N-methylpyrrolidine every hour of entry 12 in Table 2 <sup>a</sup>

| Time (h) | Yield (%) | Conversion (%) |
|----------|-----------|----------------|
| 1        | 69.58     | 72.06          |
| 2        | 87.88     | 89.99          |
| 3        | 90.40     | 91.80          |
| 4        | 80.61     | 81.68          |
| 5        | 81.37     | 82.09          |
| 6        | 74.03     | 74.48          |
| 7        | 82.45     | 83.20          |
| Average  | 80.90     | 82.19          |

<sup>a</sup> Pt/V molar ratio = 1:0.5, temperature = 210°C, pressure of H<sub>2</sub> = 25 bar, flow rate of H<sub>2</sub> = 150 sccm, WHSV = 1.2 h<sup>-1</sup>

**Table S28** The yields of N-methylpyrrolidine every hour of entry 14 in Table 2 <sup>a</sup>

| Time (h) | Yield (%) | Conversion (%) |
|----------|-----------|----------------|
| 1        | 88.93     | 89.55          |
| 2        | 84.34     | 85.59          |
| 3        | 82.63     | 84.07          |
| 4        | 84.17     | 87.26          |
| 5        | 85.62     | 87.06          |
| 6        | 84.71     | 86.66          |
| 7        | 85.72     | 87.72          |
| Average  | 85.16     | 86.85          |

<sup>a</sup> Pt/V molar ratio = 1:0.5, temperature = 210 °C, pressure of H<sub>2</sub> = 20 bar, flow rate of H<sub>2</sub> = 100 sccm, WHSV = 1.2 h<sup>-1</sup>

**Table S29** The yields of N-methylpyrrolidine every hour of entry 15 in Table 2 <sup>a</sup>

| Time (h) | Yield (%) | Conversion (%) |
|----------|-----------|----------------|
| 1        | 88.85     | 93.55          |
| 2        | 85.89     | 95.26          |
| 3        | 88.55     | 91.74          |
| 4        | 87.64     | 90.18          |
| 5        | 87.65     | 90.03          |
| 6        | 85.96     | 89.11          |
| 7        | 89.98     | 93.66          |
| Average  | 87.79     | 91.93          |

<sup>a</sup> Pt/V molar ratio = 1:0.5, temperature = 210 °C, pressure of H<sub>2</sub> = 20 bar, flow rate of H<sub>2</sub> = 100 sccm, WHSV = 1.2 h<sup>-1</sup>

**Table S30** The yields of N-methylpyrrolidine every hour of entry 16 in Table 2 <sup>a</sup>

| Time (h) | Yield (%) | Conversion (%) |
|----------|-----------|----------------|
| 1        | 84.81     | 86.89          |
| 2        | 85.91     | 87.89          |
| 3        | 86.37     | 88.89          |
| 4        | 86.11     | 88.60          |
| 5        | 85.12     | 87.13          |
| 6        | 86.51     | 88.78          |
| 7        | 86.16     | 88.64          |
| Average  | 85.86     | 88.12          |

<sup>a</sup> Pt/V molar ratio = 1:0.5, temperature = 210 °C, pressure of H<sub>2</sub> = 20 bar, flow rate of H<sub>2</sub> = 100 sccm, WHSV = 1.2 h<sup>-1</sup>

**Table S31** The yields of N-methylpyrrolidine every hour of entry 17 in Table 2 <sup>a</sup>

| Time (h) | Yield (%) | Conversion (%) |
|----------|-----------|----------------|
| 1        | 86.66     | 88.60          |
| 2        | 85.84     | 87.47          |
| 3        | 84.96     | 86.95          |
| 4        | 85.60     | 87.70          |
| 5        | 86.21     | 88.53          |
| 6        | 86.36     | 89.23          |
| 7        | 86.19     | 87.42          |
| Average  | 85.97     | 87.99          |

<sup>a</sup> Pt/V molar ratio = 1:0.5, temperature = 210 °C, pressure of H<sub>2</sub> = 20 bar, flow rate of H<sub>2</sub> = 100 sccm, WHSV = 1.2 h<sup>-1</sup>

**Table S32** The yields of N-methylpyrrolidine every hour at WHSV=0.4 <sup>a</sup>

| Time (h) | Yield (%) | Conversion (%) |
|----------|-----------|----------------|
| 1        | 82.97     | 96.02          |
| 2        | 83.99     | 98.47          |
| 3        | 84.57     | 98.70          |
| 4        | 83.07     | 98.57          |
| 5        | 83.67     | 98.58          |
| 6        | 83.76     | 98.67          |
| 7        | 83.97     | 98.68          |
| Average  | 83.71     | 98.24          |

<sup>a</sup> Pt/V molar ratio = 1:0.5, temperature = 211 °C, pressure of H<sub>2</sub> = 21 bar, flow rate of H<sub>2</sub> = 123 sccm, WHSV = 0.4 h<sup>-1</sup>

**Table S33** The yields of N-methylpyrrolidine every hour at WHSV=0.8 <sup>a</sup>

| Time (h) | Yield (%) | Conversion (%) |
|----------|-----------|----------------|
| 1        | 87.13     | 98.96          |
| 2        | 88.25     | 96.72          |
| 3        | 89.72     | 96.98          |
| 4        | 91.53     | 97.86          |
| 5        | 92.60     | 98.72          |
| 6        | 91.03     | 97.95          |
| 7        | 91.12     | 97.76          |
| Average  | 90.20     | 97.85          |

<sup>a</sup> Pt/V molar ratio = 1:0.5, temperature = 211 °C, pressure of H<sub>2</sub> = 21 bar, flow rate of H<sub>2</sub> = 123 sccm, WHSV = 0.8 h<sup>-1</sup>

**Table S34** The yields of N-methylpyrrolidine every hour at WHSV=1.6 <sup>a</sup>

| Time (h) | Yield (%) | Conversion (%) |
|----------|-----------|----------------|
| 1        | 73.53     | 78.83          |
| 2        | 74.52     | 76.32          |
| 3        | 75.72     | 76.94          |
| 4        | 76.68     | 77.50          |
| 5        | 78.20     | 78.87          |
| 6        | 79.35     | 79.99          |
| 7        | 76.14     | 76.70          |
| Average  | 76.31     | 77.88          |

<sup>a</sup> Pt/V molar ratio = 1:0.5, temperature = 211 °C, pressure of H<sub>2</sub> = 21 bar, flow rate of H<sub>2</sub> = 123 sccm, WHSV = 1.6 h<sup>-1</sup>

**Table S35** The yields of N-methylpyrrolidine every hour at WHSV=2.0 <sup>a</sup>

| Time (h) | Yield (%) | Conversion (%) |
|----------|-----------|----------------|
| 1        | 68.20     | 68.64          |
| 2        | 62.15     | 62.78          |
| 3        | 66.22     | 66.73          |
| 4        | 63.77     | 64.04          |
| 5        | 66.74     | 67.12          |
| 6        | 61.90     | 62.28          |
| 7        | 63.22     | 63.61          |
| Average  | 64.60     | 65.03          |

<sup>a</sup> Pt/V molar ratio = 1:0.5, temperature = 211 °C, pressure of H<sub>2</sub> = 21 bar, flow rate of H<sub>2</sub> = 123 sccm, WHSV = 2.0 h<sup>-1</sup>

### S3.4 Pt/V/HAP (Pt/V molar ratio=1:0.25)

**Table S36** The yields of N-methylpyrrolidine every hour<sup>a</sup>

| Time (h) | Yield (%) | Conversion (%) |
|----------|-----------|----------------|
| 1        | 47.18     | 48.03          |
| 2        | 59.86     | 62.08          |
| 3        | 53.56     | 72.17          |
| 4        | 66.15     | 69.60          |
| 5        | 69.13     | 71.10          |
| 6        | 59.55     | 63.77          |
| 7        | 42.31     | 43.71          |
| Average  | 58.43     | 63.74          |

<sup>a</sup> Pt/V molar ratio = 1:0.25, temperature = 220 °C, pressure of H<sub>2</sub>=20 bar, flow rate of H<sub>2</sub> = 100 sccm, WHSV = 1.2 h<sup>-1</sup>

## S4. Identification of N-methylpyrrolidine

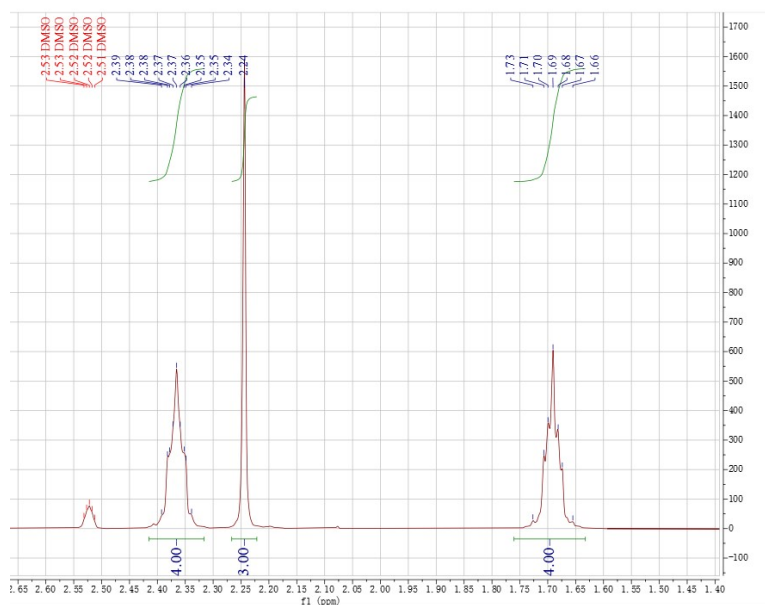

Fig.S1 The  $^1\text{H}$  NMR spectrum of NMPD

$^1\text{H}$  NMR (400 MHz,  $\text{DMSO-D}_6$ ),  $\delta$ : 1.66- 1.73 (m,4H),2.24(s,3H),2.34-2.39(m,4H)

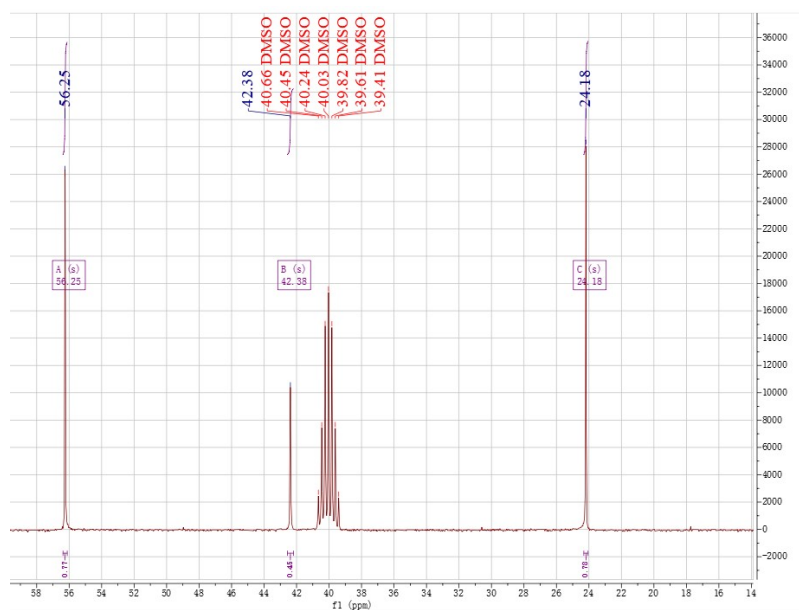

Fig.S2 The  $^{13}\text{C}$  NMR spectrum of NMPD

$^{13}\text{C}$  NMR (400 MHz,  $\text{DMSO-D}_6$ ),  $\delta$ : 24.18, 42.38, 56.25

## S5. Identification of by-products

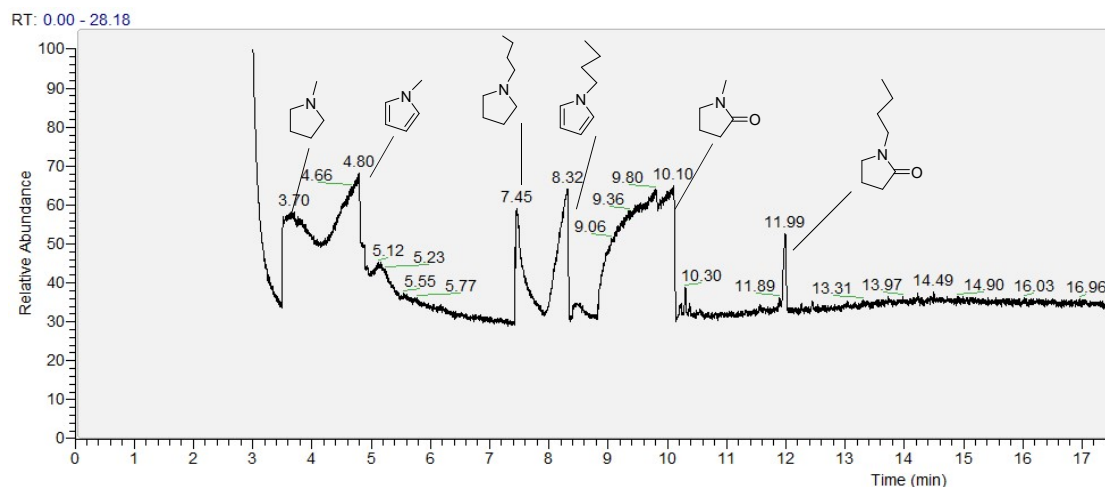

**Fig.S3** The GC-MS of crude product

Some unexpected byproducts were synthesized under the condition of temperature = 340 °C, pressure of H<sub>2</sub> = 20 bar, flow rate of H<sub>2</sub> = 100 sccm, weight hourly space velocity = 1.2 h<sup>-1</sup>, Pt/V/HAP (Pt/V molar ratio = 1:5) as the catalysts. The by-products, N-methylpyrrole, N-butylpyrrole, N-butylpyrrolidine and 1-butylpyrrolidine-2-one were detected. Probably because the exorbitant temperature could cause the dehydrogenation of NMPD to create N-methylpyrrole, at the same time, the ring of the NMPD was opened with the N-C bond broken, providing the n-butyl and prompting the N-butylpyrrole, N-butylpyrrolidine and 1-butylpyrrolidine-2-one formed.

## References

- S1 T. Mitsudome, K. Miyagawa, Z. Maeno, T. Mizugaki, K. Jitsukawa, J. Yamasaki, Y. Kitagawa, K. Kaneda, *Angew. Chem. Int. Ed.*, 2017, **129**, 9509-9513.
